1 **MultIscale MultiObjective Systems Analysis (MIMOSA): an advanced metabolic modeling  
2 **framework for complex systems****

3  
4 Joseph J. Gardner<sup>1</sup>, Bri-Mathias S. Hodge<sup>1,2,3</sup>, Nanette R. Boyle<sup>1,\*</sup>

5  
6 <sup>1</sup>Chemical & Biological Engineering, Colorado School of Mines, 1613 Illinois St. Golden, CO  
7 80403; <sup>2</sup>National Renewable Energy Laboratory, 15013 Denver West Parkway, Golden, CO  
8 80401; <sup>3</sup>Electrical, Computer and Energy Engineering, 425 UCB, University of Colorado,  
9 Boulder, CO 80309

10 \*Corresponding Author

11  
12 **ABSTRACT**

13 In natural environments, cells live in complex communities and experience a high degree of  
14 heterogeneity internally and in the environment. Unfortunately, most of the metabolic modeling  
15 approaches that are currently used assume ideal conditions and that each cell is identical, limiting  
16 their application to pure cultures in well-mixed vessels. Here we describe our development of  
17 MultIscale MultiObjective Systems Analysis (MIMOSA), a metabolic modeling approach that can  
18 track individual cells in both space and time, track the diffusion of nutrients and light and the  
19 interaction of cells with each other and the environment. As a proof-of concept study, we used  
20 MIMOSA to model the growth of *Trichodesmium erythraeum*, a filamentous diazotrophic  
21 cyanobacterium which has cells with two distinct metabolic modes. The use of MIMOSA  
22 significantly improves our ability to predictively model metabolic changes and phenotype in more  
23 complex cell cultures.

24 **KEYWORDS**

25 systems biology, agent-based modeling, metabolic flux, multi-paradigm, advanced metabolic  
26 model

27 **BACKGROUND**

28 Microbes live in complex communities where they must interact with other organisms and compete  
29 for resources to thrive. By leveraging the capabilities of each individual in the community,  
30 consortia can achieve outcomes that are not possible by any one individual species. Metabolic  
31 engineers are learning from nature and are engineering synthetic consortia to take advantage of  
32 endogenous capabilities of specialists to achieve higher yields than pure cultures. One tool that has  
33 been used extensively to aide in the rational design of strains are metabolic models (11). The most  
34 widely used stoichiometric metabolic models are constraint-based linear programming models  
35 which vary in complexity from the relatively simple flux balance analysis (FBA) to more complex  
36 FBA models which integrate regulatory and/or thermodynamic constraints (12, 13) or time-  
37 dependent responses (14). The wide use of these models is due to the ease of constructing them;  
38 access to the genome sequence is enough to build a draft metabolic network. The simplicity of this  
39 technique does come at a cost: typical model formulations are limited to modeling steady-state  
40 growth of axenic cultures assuming homogenous environmental conditions; while this works for  
41 traditional metabolic engineering efforts on single species, it cannot accurately predict the behavior  
42 of consortia. There have been a few attempts to expand the applicability of these models to  
43 communities (3, 14, 15), but these models require assumptions that oversimplify the system, such  
44 as no diffusional limitations and identical or static growth rates for the different organisms. The  
45 current benchmarks for constraints-based metabolic modeling of microbial consortia are OptCom  
46 (16) and d-OptCom (17) (OptCom's dynamic version). These approaches use inner and outer

47 linear optimization problems to satisfy species and community level objectives, leveraging the  
48 inner solution as a constraint for the outer problem. However, this approach still relies on *a priori*  
49 determination of relative objective preference as well as predetermination of both species-level  
50 and community-level objectives. Additionally, cells are treated as homogenous spatial groups (13)  
51 or homogenous species groups (14), which limits the accurate simulation of cells acting  
52 individually, interacting with their environment, and ultimately forming communities. These  
53 approaches thus discount the complexity of individual cells forming communities and, instead of  
54 acting uniformly with neighbors or species, create dynamic intercellular and inter-environmental  
55 reactions (13, 18-20).

56

57 To more accurately model the complexity of community growth, a new modeling approach must  
58 be developed. We have developed Multiscale MultiObjective Systems Analysis (MIMOSA), an  
59 advanced metabolic modeling framework for complex systems. This approach uses a multi-scale  
60 multi-paradigm metabolic modeling approach can leverage simple, powerful stoichiometric  
61 metabolic models and integrate spatio-temporal tracking of cells, nutrient diffusion, cell-cell  
62 interactions and cell-environmental interactions. This approach requires the use of both continuous  
63 and discrete variables as well as several different mathematical formalisms to reflect the multilevel  
64 behavior in populations. Therefore, we use an agent-based modeling (ABM) framework to allow  
65 direct interaction of different levels through the encapsulation of physiological, environmental,  
66 and metabolic models. ABM is a bottom-up modeling approach; the model is made up of a set of  
67 agents, which are allowed to act independently as long as they follow distinct rules of behavior  
68 defined by the user, this allows us to simulate emergent behavior of complex communities that  
69 arise from individual agent behaviors (21-24). The system behavior emerges as a result of the

70 many (tens, hundreds, thousands, millions) individuals, each following their own behavior rules,  
71 living in a defined environment, interacting with each other and the environment (22). The  
72 integration of multiple modeling formalisms to represent disparate sub-systems is a trend common  
73 in engineering and science domains (25-29) and has recently seen some developments in the  
74 systems biology area (5, 30). Agent-based modeling has been previously applied to both  
75 intercellular (12, 31) and multi-cellular processes (32, 33) but has not previously been used to  
76 model metabolic fluxes. This multi-scale multi-paradigm approach represents a novel method of  
77 integrating individuals (through agents) with previously leveraged dFBA formulations (34, 35),  
78 thereby discretizing and separating variables for computational efficient solutions with low *a*  
79 *priori* knowledge.

80

81 As a proof-of-concept study, we chose to model *Trichodesmium erythraeum*, a filamentous  
82 diazotrophic cyanobacterium. *T. erythraeum* is a major contributor to the global nitrogen cycle; it  
83 is responsible for fixing an estimated 42% of all marine biological nitrogen (36) and it leaks 20-  
84 50% of the nitrogen it fixes (37), providing surrounding organisms with a biologically available  
85 nitrogen source. Unlike other diazotrophs, which either spatially or temporally separate the oxygen  
86 sensitive nitrogenase enzyme from the water splitting reaction of photosynthesis (oxygen  
87 production), *T. erythraeum* is unique because it simultaneously carries out nitrogen and carbon  
88 fixation during the day in different cells along the same filament (trichome). Therefore, it is the  
89 ideal model system for the development of MIMOSA: it has structurally identical cells that operate  
90 in two distinct metabolic modes (photoautotrophic and diazotrophic), a published genome scale  
91 model (3), transcriptome data, and a plethora of *in situ* and laboratory data to both train the model  
92 and validate predictions. We use this organism as a test-case for the modeling framework and



## 96 **RESULTS**

97 **Model Formulation.** We developed MIMOSA by integrating an updated version of the genome-  
98 scale metabolic model (3) (Table S1 for updated reactions) with nutrient diffusion, light diffusion,  
99 cell/cell interaction and cell/environment interactions (see Figure 1) using an agent based modeling  
100 framework. We have also implemented the use of multiobjective optimization to account for the  
101 dual cellular objective of producing biomass and the metabolite which is transacted between cells  
102 (glycogen or  $\beta$ -aspartyl arginine, depending on cell type). Constraints were imposed on the model  
103 as reported previously (3) with two notable exceptions. First, the ultimate product of nitrogen  
104 fixation was changed from ammonium to  $\beta$ -aspartyl arginine, which is the monomer used to create  
105 cyanophycin, a nitrogen storage polymer in *T. erythraeum* and other diazotrophic cyanobacteria  
106 (38-40). Second, the two major storage polymers, glycogen (modeled as maltose, or two linked  
107 glucoses) and cyanophycin (modeled as  $\beta$ -aspartyl arginine), were decoupled from the biomass  
108 formation equation so that they could freely accumulate or be metabolized. More detail about the  
109 formulation of the model is provided in Methods and Supplemental Text.

110

111 **Tracking Changing Cellular Objectives.** MIMOSA evaluates the cellular objective for each cell  
112 for each time step based on the changing environmental conditions. As an example of this, we  
113 have tracked how the Pareto front changes for both photoautotrophic and diazotrophic cells over  
114 time (Figure 2). With increasing time, diazotrophs shift their objective away from biomass toward  
115 the production of cyanophycin as carbon becomes more available (Figure 2A). In contrast,  
116 photoautotrophic cells see a maximum production of glycogen at 9 hours after the onset of light  
117 and then their productivity decreases (Figure 2B). It is notable that every cell in the population is  
118 performing these decisions in parallel and Figure 2 is for a single representative cell of each cell

119 type. Cell optimization changed based on environmental conditions and agent rules and the Pareto  
120 Fronts representing this behavior in these contexts is visualized in Fig. S1.  
121

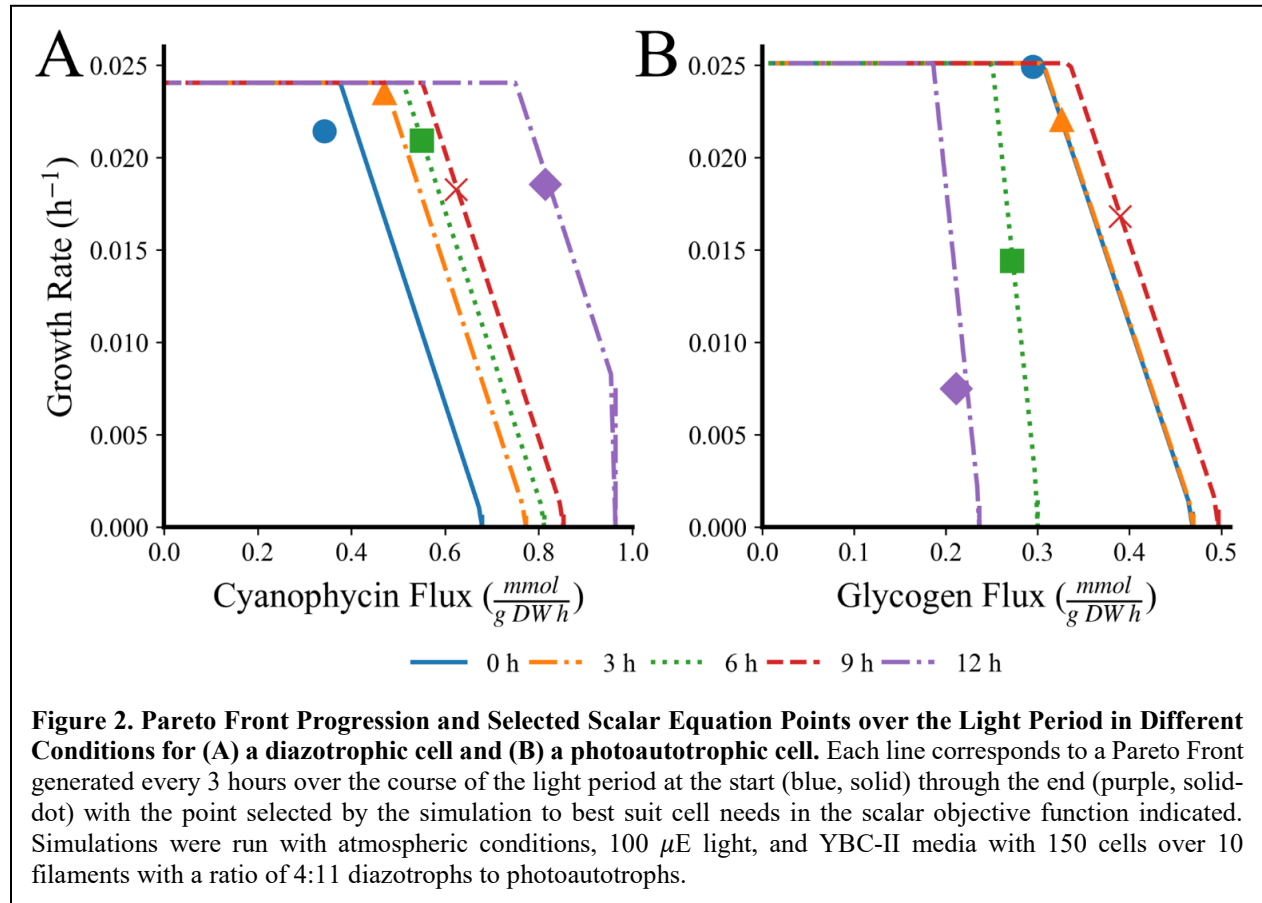

122  
123 **Model Validation.** In order to test the predictive accuracy of the model, we predicted growth rate  
124 for a variety of different light intensities (Figure 3A) and compared to other published models for  
125 *T. erythraeum* (1, 2) as well as other experimentally measured growth rates (1, 3, 6, 9, 10, 41)  
126 exhibiting light saturation at higher light intensities. Ultimately, our model is a metabolic model,  
127 so it is important that it can also capture the metabolic changes that occur in response to changes  
128 in the environment. Therefore, we compared predictions of biomass changes to data collected in  
129 our laboratory for growth in different light intensities (see Figure 3B). The model was trained on

130 data collected in 100  $\mu\text{E}$  light and was validated with data collect in 50  $\mu\text{E}$  light over a twelve-  
131 hour light period.

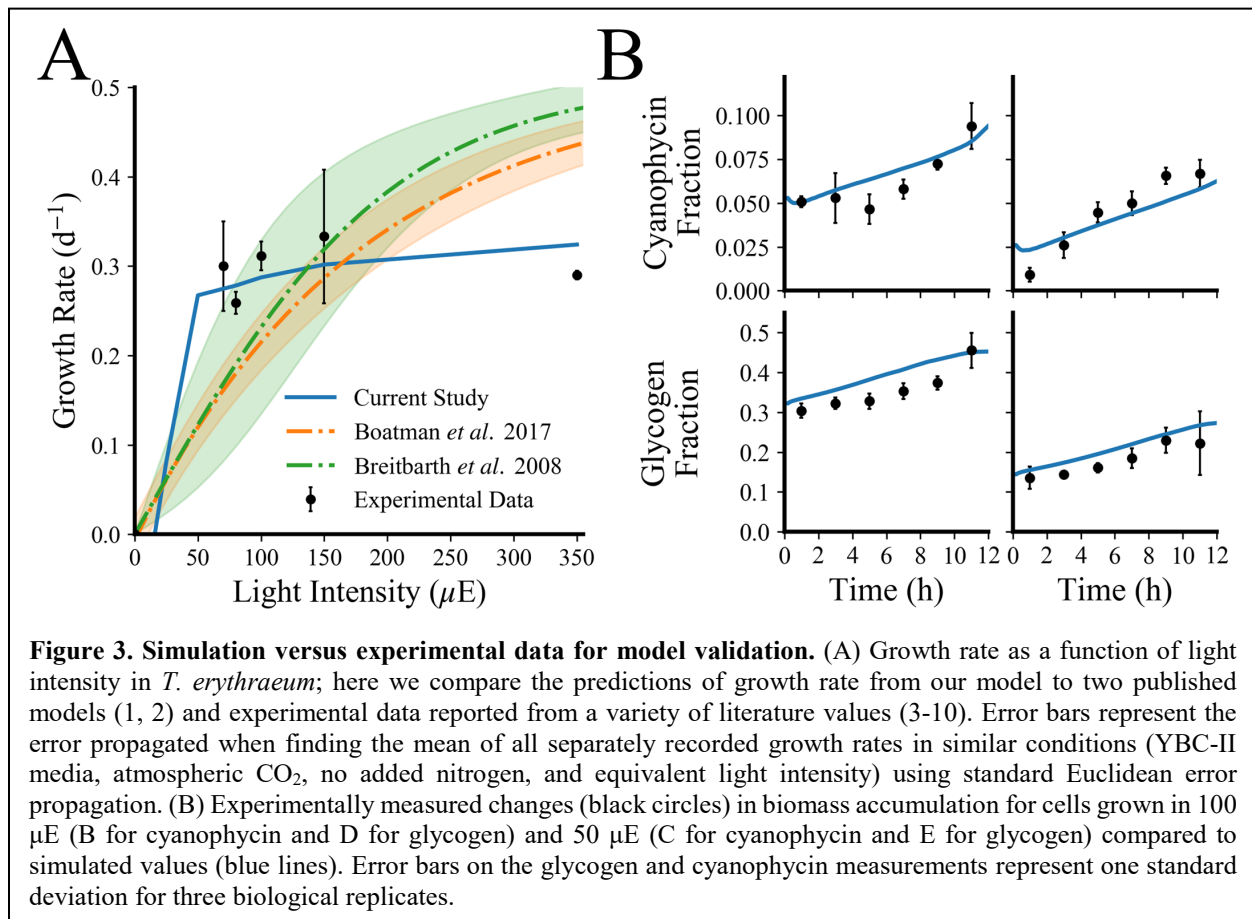

132  
133 **Cells Alter Their Microenvironment.** An advantage of the modeling approach we have  
134 developed is that we can track nutrients in the environment. Carbon dioxide (CO<sub>2</sub>) is typically the  
135 limiting substrate in aquatic photosynthetic growth due to low ambient concentrations and low  
136 solubility; for ambient CO<sub>2</sub>, Henry's law defines an equilibrium concentration of 2.3  $\mu\text{M}$  in the  
137 ocean. It is well known that photosynthetic microorganisms use carbon concentrating mechanisms  
138 (CCM) to concentrate CO<sub>2</sub> near the carbon fixing enzyme, ribulose-1,5- biphosphate  
139 carboxylase/oxygenase (RuBisCO) to overcome low selectivity (42); our simulations imply that  
140 cells also increase the local concentration of CO<sub>2</sub> immediately surrounding the cell (Figure 4A)



141 and the release of nitrogen to the media including at more frequent time steps (Figure 4B). The  
142 simulation covers 150 cells and 10 filaments in a model  $0.625 \text{ mm}^3$  environment, corresponding  
143 to a filament density of  $16 \times 10^6 \text{ trichomes m}^{-3}$ , well within the *in situ* ranges of free trichome  
144 density (43). This illustrates that the simulation corresponds well quantitatively to realistic local  
145 environments. At the end of our simulation, the cells on average can create a microenvironment  
146 that is roughly 2 fold higher in  $\text{CO}_2$  than the surrounding ocean. By looking at flux through major  
147 pathways, it appears that the  $\text{CO}_2$  is derived from high fluxes through the oxidative PPP and TCA  
148 Cycle in diazotrophic cells (Figure 5).

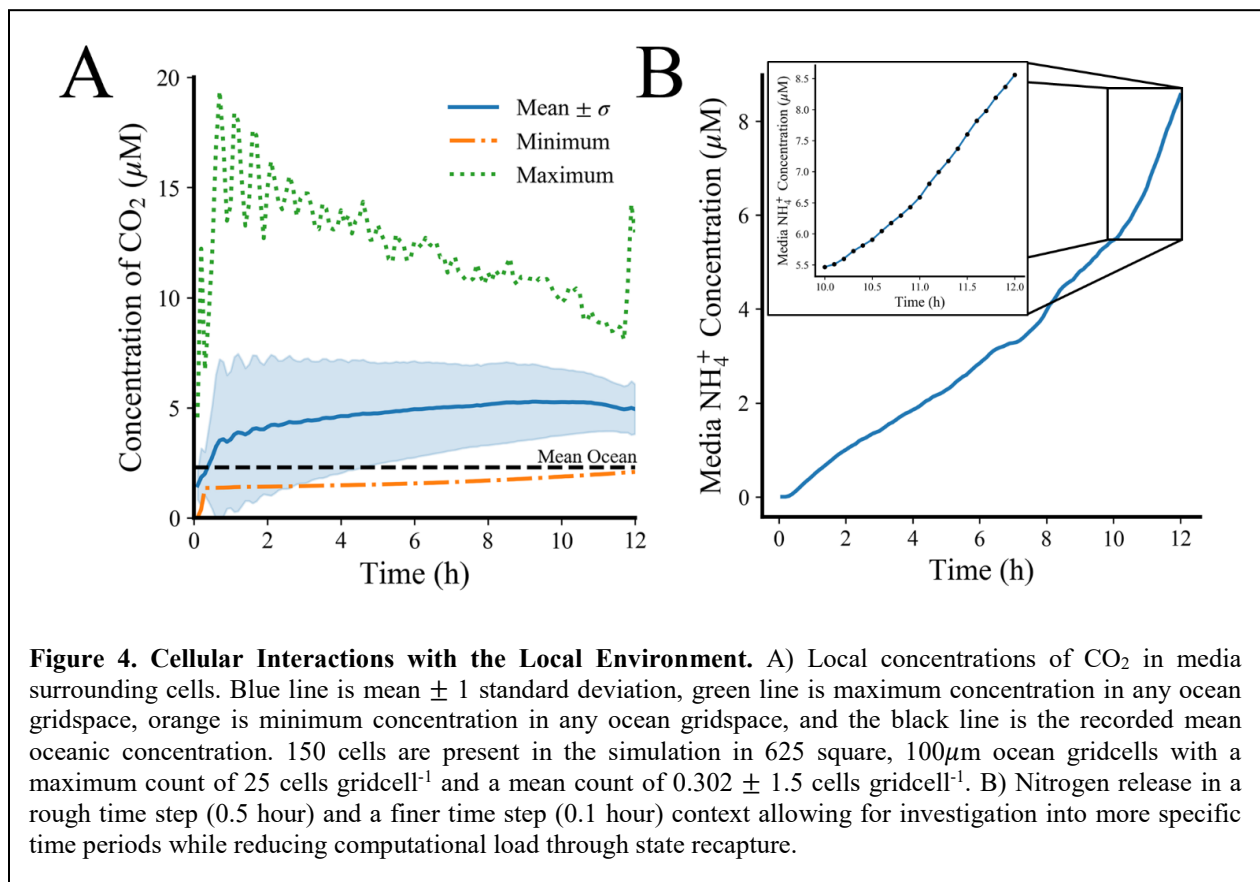

149  
150 **Modeling a Heterogeneous Cell Population.** One of the main advantages of this new modeling  
151 approach is that individual cells can be tracked in space and time so the heterogeneity of the  
152 population can be quantified (in terms of metabolic flux distributions). As an example, we tracked

153 150 cells over a 12-hour time period with time steps of 6 seconds which results in a total of 18,000  
154 metabolic flux maps. Since this is an overwhelming amount of data to visualize, we have chosen  
155 to focus on a few representative flux maps (see Figure 5). In the left column, we track how the  
156 ammonium composition of the environment surrounding the cells changes with time from the  
157 initial seeding of cells at 0 hours to the middle of the daytime period (6 hours) to right before the  
158 onset of night (12 hours). These panels depict the release of ammonium into the environment as  
159 time progresses, and it is higher in areas where the cell density is highest. This agrees well with *in*  
160 *situ* data which reports that *T. erythraeum* leaks 30-50% of the nitrogen it fixes (37); our  
161 simulations predict that approximately 20% of the nitrogen fixed by the community is excreted  
162 into the medium. It is also important to note that the majority of ammonium is released by the cells  
163 in the second half of the day; during the first 6 hours, the cells release a total of 1.28  $\mu$ moles  
164 compared to 4.61  $\mu$ moles in the last six hours of the day. Again, this agrees with previous literature  
165 reports that the rate of nitrogen fixation peaks at midday (44), therefore we would expect more  
166 secretion of ammonium after peak nitrogenase activity. Select flux maps of cells growing in areas  
167 of low ammonium (top), medium ammonium (middle) and high ammonium (bottom) are depicted  
168 in the middle column of Figure 5. At the beginning of the simulations, cells are seeded in an  
169 environment that is identical to the defined marine medium YBC-II and because of this, they have  
170 identical flux maps as shown by the distribution graph in the right column. At time 0, we have a  
171 bimodal distribution because there are two cell types: photoautotrophic and diazotrophic.  
172 Photoautotrophic cells have high flux through the Calvin Cycle and the diazotrophic cells are  
173 operating in a more respiratory mode, with high flux through both the oxidative PPP and TCA  
174 Cycle. As the cells grow and start to experience more heterogeneity in their environment, they  
175 respond by differentiating their metabolism within the filament (Figure S2). First, this is evident

176 in the frequency distribution plot, where they are both diverging in terms of total metabolic flux  
177 distributions and moving toward achieving optimal flux in terms of the objective function for both  
178  $t = 6$  hours and  $t = 12$  hours. By comparing the changes that occurs in metabolic flux between areas  
179 of low, medium, and high ammonium, we can learn a few things about cellular physiology. In all  
180 cases, photoautotrophic cells have high flux through the Calvin cycle and an incomplete TCA  
181 Cycle, which has been widely reported in cyanobacteria grown phototrophically (45). In the case  
182 of *T. erythraeum*, succinic semialdehyde is derived from the nitrogen storage compound  
183 cyanophycin and is fed into the TCA Cycle to support the production of biomass precursors and  
184 glycogen (through gluconeogenesis). When external ammonium is high, photoautotrophic cells  
185 have less flux to glycogen, presumably because they do not need to provide as much to the  
186 diazotrophic cells to obtain fixed nitrogen in return. Investigations into imbalances in both  
187 metabolites and relative cell quantity display mechanisms of ammonium loss to the environment.  
188 Figure S3A illustrates how a lack of glycogen flux results in a higher loss of ammonium (with the  
189 exceptions of recently divided cells which metabolize glycogen with high ammonium loss) while  
190 Figure S3B visualizes a clear minimum ammonium release in the recorded range of percent  
191 diazotrophs per filament (between 15 and 30%). Diazotrophic cells have high flux through both  
192 the oxidative PPP and the TCA cycle which still utilizing carbon fixation reactions such as  
193 RuBisCO and PEP carboxylase and carbon conserving reactions like the glyoxylate shunt. Flux  
194 through the glyoxylate shunt increases as the availability of ammonium increases outside the cell,  
195 which is likely in response to the lower glycogen transfer from the photoautotrophs.

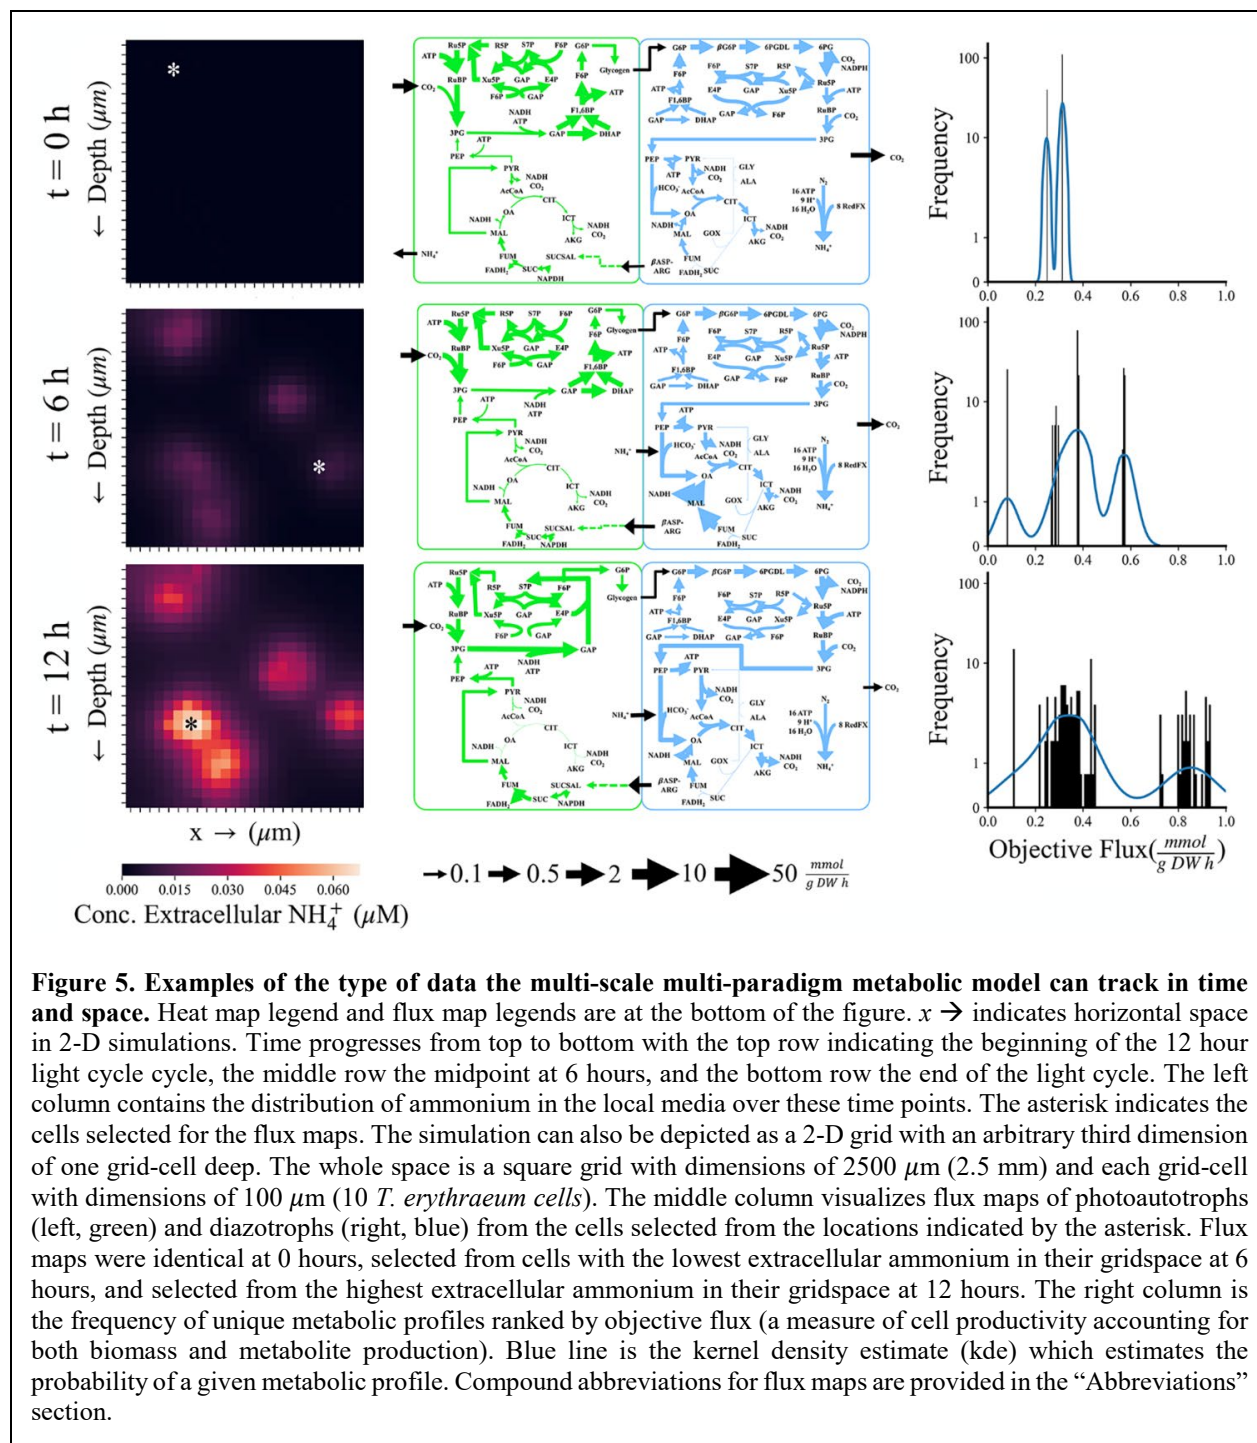

196

197 **Elucidating Rules of Cell Physiology.** A key feature of agent-based modeling is the ability to

198 model emergent behaviors in populations. We do not know all the rules of behaviors that define

199 *T. erythraeum* a priori but by comparing simulations to observed *in situ* data and iterative

200 improvement of the model, some rules can be elucidated. One trait that is widely variable in nature  
201 is filament length. It has been widely accepted that the average filament length is 100 cells (46)  
202 but more recent studies have suggested that they are typically much shorter, with a geometric mean  
203 of  $13.2 \pm 2.3$  cells per filament, but with a mean range of 1.2 to 685 cells per filament *in situ* (47).  
204 Conditions for *in situ* sampling are widely variable so we hypothesized that filament length plays  
205 a role in maintaining growth in different environments: low light, low CO<sub>2</sub> and low N<sub>2</sub>. We used  
206 the model to investigate which conditions might favor shorter or longer filaments (Figure 6). For  
207 each simulation, 150 total cells were seeded but in different trichome lengths (10, 30, 75, and 150  
208 cells/filament) with and a ratio of diazotrophs to photoautotrophs of 3:7. In terms of growth rate,  
209 across all conditions we tested the shorter filaments had faster growth. This implies that diffusional  
210 limitations of nutrients into the cell and metabolites within the filament between different cell types  
211 start to hamper growth rate at longer filament lengths. The relative decline in growth rate is less  
212 dramatic for 25  $\mu$ E when comparing across filament length, but when compared to other light  
213 conditions, there is a dramatic drop in growth rate for shorter filaments at low light. This indicates  
214 that longer filaments are capable of compensating for less light better than shorter filaments,  
215 perhaps due to increased surface area. Next, we examined the effect of filament length on  
216 cyanophycin composition for the same growth conditions as above. In every condition except low  
217 nitrogen, filaments with 75 cells appear to have more cells with above average cyanophycin  
218 content than other filaments lengths. Smaller nitrogen compounds (NH<sub>4</sub><sup>+</sup>, amino acids, urea, etc.)  
219 can theoretically be used to support growth, permitting cyanophycin to be a longer-term storage  
220 compound. This is a possible explanation for the increase of cyanophycin in longer filaments. As  
221 filaments are longer, diffusive limitations become more pronounced, meaning that nitrogen  
222 gradients will remain in nitrogen replete cells longer and will be remade into cyanophycin as

223 opposed to being metabolized for growth. This makes intuitive sense: not only is there a final drop-  
 224 off at 150 cells, the distribution of cyanophycin content within the cells becomes larger, suggesting  
 225 that some cells are starved for nitrogen and some are nitrogen replete. It is probable that filaments  
 226 have adapted to leverage diffusion to both sequester nitrogen and to mitigate futile cycling of  
 227 carbon and nitrogen compounds when diatomic nitrogen is available. The pattern of cyanophycin  
 228 content diverges for cells in nitrogen limited environments due to overall shortages of nitrogen  
 229 within the filament.

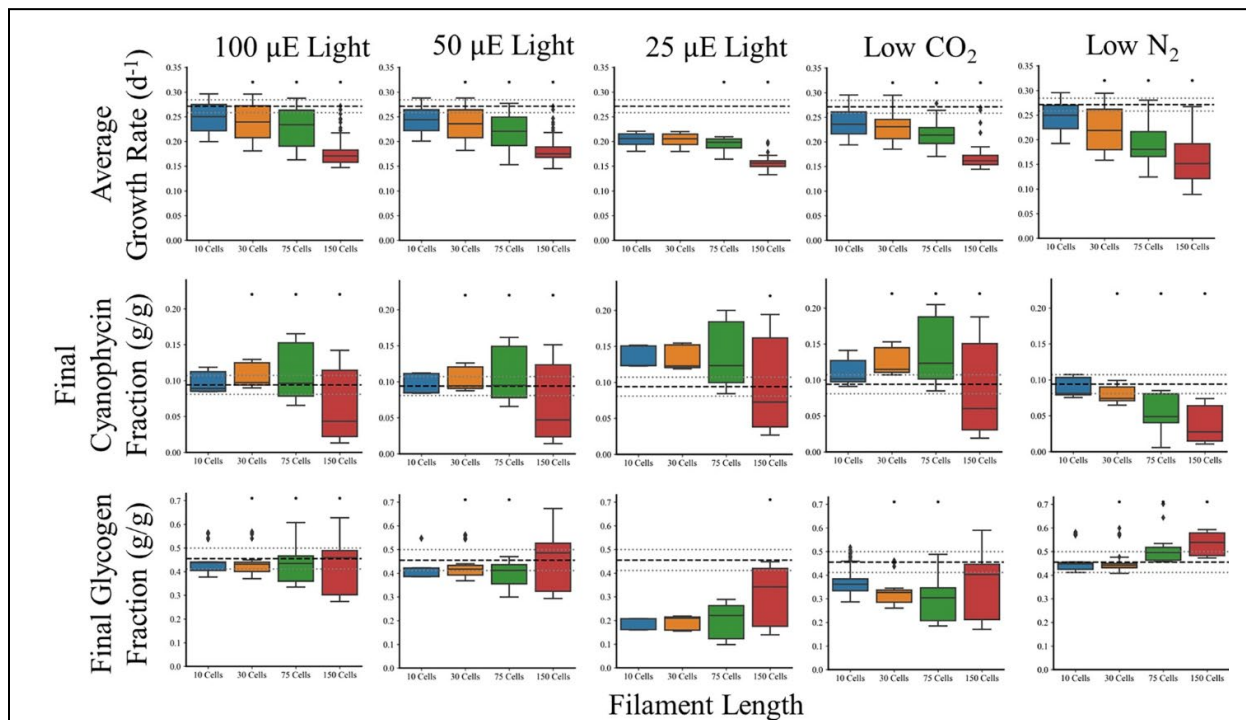

**Figure 6. Trichome length affects the performance of the community.** Trichomes were varied in initial length from short (10 cells filament<sup>-1</sup>) to long (150 cells filament<sup>-1</sup>) but with identical diazotroph: photoautotroph ratios of 3:7 (excepting 75 cells filament<sup>-1</sup> which was 3.1:7) and initial cell counts (150 total) in the total population. Black asterisks are Student's T-tests P-Values < 0.05 when comparing that cellular population to the 100 μE case in every group. Dashed black lines are experimentally measured values and the gray dashed lines are their standard errors measured in the Boyle Laboratory ( $0.271 \pm 0.0129$  d<sup>-1</sup> for growth rate,  $0.0939 \pm 0.0131$  g cyanophycin/g DW,  $0.455 \pm 0.0440$  g glycogen/g DW). Growth conditions represent the columns progressing as follows: 100 μE light in YBC-II media and atmospheric conditions, 50 μE light in YBC-II media and atmospheric conditions, 25 μE light in YBC-II media and atmospheric conditions, 1.25 mM (versus 2.5 mM) HCO<sub>3</sub><sup>-</sup> and 200 ppm (versus 400 ppm) CO<sub>2</sub> in otherwise atmospheric conditions and YBC-II media with 100 μE light, and 0.395 atm (versus 0.79 atm) N<sub>2</sub> in otherwise atmospheric conditions and YBC-II media with 100 μE.

230

231 Finally, we investigated how glycogen content of cells changes due to filament length. The first  
232 pattern to note is that as length increases, the heterogeneity of the filament in terms of glycogen  
233 content also increases. This illustrates the importance of tracking individual cells because they are  
234 experiencing different environments and responding in different ways. Longer filaments also  
235 appear to be able to maintain glycogen content more readily than shorter filaments in all stress  
236 conditions we tested. Finally, nitrogen limited growth results in increased glycogen content as seen  
237 in other cyanobacteria (48). It appears that longer filaments in N limited growth can accumulate  
238 more carbon, perhaps again due to higher surface area and hence more energy from light  
239 harvesting. Our simulations agree well with published studies; it has been reported that growth  
240 rate and light intensity are both inversely correlated to filament length (49). This data indicates  
241 that filament length is largely determined by external cues rather than genetically.

242

## 243 **DISCUSSION**

244 MIMOSA enables the most detailed and accurate metabolic modeling of complex systems to date  
245 by allowing coupling of several different mathematical formalisms describing natural phenomena,  
246 behavioral rules, and metabolism into a multi-scale multi-paradigm model. In constructing  
247 MIMOSA, we have added several features to enable us to more accurately predict phenotypes. A  
248 key feature of MIMOSA is the use of a multi-objective optimization approach. Unlike fast growing  
249 bacteria, which have successfully been modeled using a single objective function of maximum  
250 biomass (50), slow growing organisms have more complex objectives. In our simulations, *T.*  
251 *erythraeum* cells must achieve a delicate balance between biomass formation and the production  
252 of either glycogen or cyanophycin due to the symbiotic relationship between two cell types in the  
253 same filament. Photoautotrophs cannot function optimally without a biologically available form

254 of nitrogen from the diazotrophs and the diazotrophs cannot support their metabolism without  
255 reduced carbon from the photoautotrophic cells. The use of multi-objective optimization allows us  
256 to describe this trade-off more accurately and by calculating the Pareto Front *a priori* we can also  
257 reduce computational effort. We have also accounted for changes in biomass composition that  
258 occur in response to changes in the environment or as a result of building carbon and nitrogen  
259 reserves during the day by decoupling the biomass equation. This allows the model to respond  
260 more fluidly to changes in the environment, which more closely mimics what cells experience in  
261 nature; for example, macro- and micro-nutrient stresses have been well known to cause changes  
262 in metabolism such as lipid and carbon accumulation (51-56). As such, the inclusion of metabolite  
263 and nutrient diffusion to augment metabolic optimization is a critical aspect of the model.

264

265 The influences of nutrient and energy availability in conjunction with population characteristics  
266 were studied to determine community and cellular adaptations to environmental perturbations. The  
267 model allows us to quantify the changes in the microenvironment around the cell compared to the  
268 bulk properties of the environment (Figure 4A) as well as to see how these changes affect the  
269 distribution of carbon and nitrogen inside the cell (Figure 5). These can be supplemented with  
270 “zooming in” on specific time steps to enhance investigation to rapidly occurring phenomena  
271 (Figure 4B). Not only did our predicted growth rates quantitatively match the experimental data,  
272 it was better able to capture effect of light saturation on growth rate; light intensities above 100  $\mu\text{E}$   
273 have little to no effect on growth rate (2, 49, 57-59). Our simulations agree well with the  
274 experimental data, however, there are differences that can be explained by the differences between  
275 our experimental conditions and our simulations. The main difference being the effect of diurnal  
276 light; *T. erythraeum* will not grow without diurnal day/night patterns, therefore the experimental



277 data was collected from cells that were grown in 12 h: 12 h day/night cycles but the model is for a  
278 single 12-hour day time period. The addition of diurnal light patterns in future iterations of this  
279 model will help to improve the light dependent growth phenotype. Even so, the model is able to  
280 visualize community coordination and development during the 12 hour light period, exhibiting the  
281 increased release of ammonium to the media in the afternoon, consistent with the observation that  
282 nitrogenase activity peaks midday (44). Moreover, the individualized resolution of metabolic  
283 optimization can probe the nuances of intercellular, intracellular, and cell-environment  
284 interactions. Analysis of metabolic flux reveals a spontaneous partial/linear TCA Cycle in  
285 photoautotrophic cells consistent with previous reports (45). Cells also naturally coordinate to  
286 provide glycogen and cyanophycin transfer between cells, yielding oxidative behavior in  
287 diazotrophic cells through glycolysis with the possible side effect of oxygen consumption as a  
288 mechanism to protect nitrogenase as suggested in experimentation (58). Meanwhile,  
289 photoautotrophs naturally perform reductive carbon fixation coupled with utilization of the lower  
290 TCA Cycle to degrade arginine. These metabolic functions are affected by extracellular forces  
291 which are integrated into this model. For example, high ammonium environments result in  
292 declining gluconeogenesis in photoautotrophs (12 hours in Figure 5), likely since these cells are  
293 energetically limited and use cyanophycin as an energy source instead of light. Diazotrophs are  
294 prone to these environmental cues as well as low ammonium environments enhance light TCA  
295 Cycle to enhance recycling of amino acid byproducts from a lack of nitrogen. These observations,  
296 coupled with the diversity of metabolic profiles available to a relatively small population, By  
297 integrating modeling of other phenomenon with constraints based metabolic models, we were able  
298 to simulate *T. erythraeum* cultures that more accurately represent both *in situ* and laboratory data.  
299

300 One of the many advantages of using this multi-paradigm framework is that we can simulate  
301 emergent behavior of a population. *In situ* data reports a wide mean range of trichome length from  
302 1.2 to 685 cells (47); we used the model to investigate possible causes because this is a difficult  
303 phenotype to investigate experimentally. Our simulations suggest that even though longer  
304 filaments suffer from diffusional effects that limit growth, they are better able to handle stress  
305 (Figure 6) consistent with literature. Increased surface area in longer filaments minimizes the effect  
306 of lower light because the filament can harvest more light per volume. Also, the larger filaments  
307 are better able to maintain the average composition of storage compounds despite low carbon or  
308 low nitrogen conditions. Therefore, we would expect in areas of nutrient or light stress, the filament  
309 length would be longer.

310

311 One of the other unusual phenotypes of *Trichodesmium* that we were able to investigate using  
312 MIMOSA was leaking 30-50% of the nitrogen it fixes. Nitrogen fixation is an incredibly energy  
313 intensive process, costing the cell 8 ATP per ammonium, so it is not clear why *T. erythraeum*  
314 would excrete 30 – 50%. Despite using optimization to solve for fluxes, which should minimize  
315 energy losses, our simulations predict approximately 20% of the fixed nitrogen is excreted into the  
316 medium (Figure S4) which implies that this is a metabolically driven phenomenon. Further  
317 investigation has led us to develop three hypotheses on why this occurs: carbon limitation in  
318 diazotrophs, energy limitation in photoautotrophs, and imbalances between photoautotroph:  
319 diazotroph ratios. In the first case, photoautotrophs are unable to create glycogen chains and  
320 instead must start from a higher energy substrate than carbon dioxide (like succinic-semialdehyde)  
321 or must perform glycolysis on arginine derivatives to achieve energetic viability (Figure S3A).  
322 Second, population imbalances cause nitrogen to be produced faster than it can be anabolized into

323  $\beta$ -aspartyl-arginine chains and is released into the media, meaning there is an optimal ratio of cell  
324 types (Figure S3B). It is also possible that carbon limited diazotrophs are unable to manufacture  
325 full  $\beta$ -aspartyl-arginine chains and proton imbalances require ammonium release to the medium  
326 instead of passage to surrounding photoautotrophs.

327

328 MIMOSA enables the tracking of cellular-level environmental changes and the impact that they  
329 have on a metabolic model, opening the door to more accurate modeling of multi-cellular systems  
330 and the *in silico* investigation of the complex interactions between different cell types within an  
331 organism, and different species in a community. This is the first report of a metabolic model that  
332 integrates nutrient and light diffusion, cell/cell interactions and cell/environment interactions and  
333 we have used it to accurately predict growth, cellular composition and to investigate the unique  
334 physiology of *T. erythraeum*, which has filaments of both diazotrophs and photoautotrophs in close  
335 proximity. It establishes that this organism can effectively adapt to different conditions at three  
336 levels: the genetic level through division of labor in separate cell types, the metabolic level through  
337 relatively open-ended metabolic capabilities as well as further division within types, and at the  
338 population level to harness diffusional and physical interactions with the environment. MIMOSA  
339 is also a readily adaptable modeling framework – the addition of additional species to the model  
340 only requires the availability of a genome-scale metabolic and a few rules of behavior to be added.  
341 While we focused the proof-of-concept study of *T. erythraeum*, MIMOSA is a modeling  
342 framework that can be used to model a variety of more complex systems including applications in  
343 ecology, human health and metabolic engineering.

344

345 **MATERIALS/METHODS**

346 **Cell Culture Conditions**

347 Cells were grown as described previously (3). *Trichodesmium erythraeum* IMS101 cells were  
348 acquired from the Bigelow Laboratory for Ocean Sciences (East Boothbay, ME, USA). Cells were  
349 grown in a New Brunswick (Hamburg, Germany) with 100 and 50  $\mu\text{E}$  in 12h light/12h dark cycles.  
350 Cells were grown in artificial seawater YBC-II medium (60) at pH 8.15-8.20.  $\text{CO}_2$  was maintained  
351 at atmospheric concentration. All chemicals were obtained from Sigma-Aldrich (St. Louis, MO).  
352 Growth rate was monitored by measuring chlorophyll absorbance (61) from 50 mL of culture every  
353 two days. Cyanophycin and glycogen were measured every four hours from the beginning of the  
354 light cycle (9 AM) to its end (9 PM). Total biomass mass was determined by dry weight analysis,  
355 cells were filtered with a Whatman 0.22  $\mu\text{m}$  cellulose-nitrate filter and dried overnight at 100°C.

356 **Biomass Quantification**

357 Carbohydrates were measured colorimetrically using the anthrone method (62) against glycogen  
358 as a standard. Cyanophycin was extracted by disrupting 740  $\mu\text{L}$  of 250 mL cells concentrated to 2  
359 mL via filtration and rinsing with TE buffer with 2.70 mg/mL lysozyme overnight at 37 °C,  
360 centrifuging at 16,100 x G for 5 min, and resuspending the pellet in 1 mL of 0.1 M HCl (in which  
361 cyanophycin is soluble) for 2 h. The extraction was repeated on the pellet, the supernatant fractions  
362 were combined, and cyanophycin was quantified colorimetrically using the Sakaguchi reaction  
363 (63).

364 **Mass Balance Constraints.** Constraints based metabolic models are based on mass balances,  
365 therefore it is imperative that we develop accurate accounting of each element. Therefore, we used  
366 training data (Table S2) to estimate normal cellular consumption (Table S3). Average objective  
367 fluxes were estimated using mass balances around biomass and metabolite production with the  
368 formulation:

369

$$U = M + G + P + L \quad (1)$$

370 Where  $U$  corresponds to uptake,  $M$  is the nitrogen or carbon required for maintenance metabolism,  
371  $G$  is the accumulation of fixed carbon or nitrogen during growth into non-biomass metabolites,  $P$   
372 is the accumulation of fixed carbon or nitrogen that is passed to the other cells, and  $L$  is the carbon  
373 or nitrogen leaked into the surrounding media. This can be further detailed into carbon and nitrogen  
374 energy balances (defined as above with the subscript “N” for nitrogen and “C” for carbon):

$$U_N = 2\nu_{N_2} + \nu_{NO_3^-} + \nu_{NO_2^-} + 2\nu_{urea} \quad (2)$$

$$M_N = -5 \frac{\Delta m_{c_{ph}, Night}}{N_{c_{ph}} \bar{X}_t \Delta t} \quad (3)$$

$$G_N = \mu Y_{N/X} \quad (4)$$

$$P_N = 5 \frac{\Delta m_{c_{ph}, Day}}{N_{c_{ph}} \bar{X}_t \Delta t} \quad (5)$$

$$L_N = -\frac{\Delta C_{NH_4^+}}{\bar{X}_t \Delta t} \quad (6)$$

375 Where  $\nu$  corresponds to flux of the substrate (indicated in the subscript),  $m$  is mass,  $N$  is molar  
376 mass, the subscript  $c_{ph}$  is cyanophycin,  $\bar{X}_t$  is average biomass over the measured time period ( $\Delta t$ ),  
377  $\mu$  is growth rate,  $Y_{N/X}$  is the nitrogen stoichiometry in biomass estimated by the biomass  
378 composition. The stoichiometric coefficients represent the number of nitrogen atoms in each  
379 molecule; 2 per diatomic nitrogen and 5 per  $\beta$ -aspartyl arginine. The flux of nitrogen ( $\nu_{N_2}$ ) is  
380 measured and recorded via the acetylene assay for nitrogenase activity as recorded in the literature  
381 for the same growth conditions.  $G_N$  was approximated using the model’s prediction for cellular  
382 composition of nitrogen using the biomass equation and balanced equations. The fraction of

383 cyanophycin in biomass was measured analytically at 6 timepoints throughout a single 12-hour  
384 daytime period (See *Biomass Quantitation* in methods). Ammonium release over a 12-hour period  
385 was below detectable limits ( $< 1 \mu\text{g/L}$ ) (64) in our laboratory experiments. If we re-arrange this  
386 equation to solve for the average flux of nitrogen into a single cell,  $\bar{v}_N$ , we obtain the following  
387 equation which can be used to solve for  $\bar{v}_N$  or  $v_{N_2}$ :

$$\bar{v}_N = 2v_{N_2} + \frac{\Delta C_{NH_4^+}}{\bar{X}_t \Delta t} = \mu Y_{N/X} - 5 \frac{\Delta m_{cph, Night}}{N_{cph} \bar{X}_t \Delta t} + 5 \frac{\Delta m_{cph, Day}}{N_{cph} \bar{X}_t \Delta t} \quad (7)$$

388 Assuming each cell requires the same amount of nitrogen, that only diazotrophs reduce diatomic  
389 nitrogen, that the average ratio is 4:1 photoautotrophs to diazotrophs (44) for estimation of training  
390 data for consumption and production, and that cells do not release ammonium at optimal  
391 production, maximum nitrogen flux into a photoautotrophic cell can be approximated as:

$$\bar{v}_{cph} = \frac{2}{5} v_{N_2} \quad (8)$$

392 The same approach is taken for the carbon mass balance.

$$U = M + G + P \quad (9)$$

393 Where:

$$U_C = v_{CO_2} \quad (10)$$

$$M_C = -12 \frac{\Delta m_{gly, Night}}{N_{gly} \bar{X}_t \Delta t} \quad (11)$$

$$G_C = \mu Y_{C/X} \quad (12)$$

$$P_C = 12 \frac{\Delta m_{gly, Day}}{N_{gly} \bar{X}_t \Delta t} \quad (13)$$

394 And:

$$v_{CO_2} = \mu Y_{C/X} - 12 \frac{\Delta m_{gly, Night}}{N_{gly} \bar{x}_t \Delta t} + 12 \frac{\Delta m_{gly, Day}}{N_{gly} \bar{x}_t \Delta t} \quad (14)$$

395 In this case, the variables are the same except for subscripts C (carbon), gly (glycogen). And  $CO_2$ .  
396  $G_C$  represents the stoichiometric predictions of elemental composition and  $v_{CO_2}$  is approximated  
397 using equation 10. This allows prediction of maximal glycogen flux (assuming 12 carbon  
398 molecules per glycogen, since it is modeled as disaccharide glucose or maltose) using:

$$\bar{v}_{gly} = \frac{v_{CO_2}}{12} \quad (15)$$

399 **Development of Agent Based Model.** Repast Simphony (65) in Java was used as the agent-based  
400 modeling framework in which differentiated multi-objective metabolic models of *Trichodesmium*  
401 *erythraeum* are contained. It contains three agent types – Ocean, Cells, and Filaments. The Cells  
402 agent contains two sub-agents representing each cell type: photoautotrophs and diazotrophs and is  
403 responsible for intracellular processes and decisions. The Ocean agent defines and calculates the  
404 extracellular environment and the Filaments agent organizes the Cells and modulates their  
405 transactions.

#### 406 *Cells*

407 Cell agents (cells) are generated for each individual cell in the model. These contain two subtypes,  
408 photoautotrophs and diazotrophs, but contain several consistent elements between the two.  
409 Simulation variables are summarized in Table S4. All cells reproduce according to the same rules:  
410 cells divide according to sampling from the weighting distribution described above if that sample  
411 is bigger than the cell mean cell, cells only extend from the ends, and cells can only divide into  
412 diazotrophs if there is a diazocyte under development (decided at the filament level if the filament  
413 is nitrogen limited). When a cell is large enough, it converts to fully stationary growth, producing  
414 only metabolites and creating a larger and larger metabolic gradient between cells without *de novo*

415 biomass synthesis. This prevents a cell from becoming excessively large in the center of the  
416 filament. Cells will die if they cannot produce the requisite maintenance ATP through metabolism  
417 or catabolism.

418

419 Cells allow metabolites to diffuse through the lipid bilayer using permeabilities reported in the  
420 literature (Table S5). This mechanism represents a non-zero leakage scenario that was nevertheless  
421 much slower than intrafilamental diffusion (Table S6). Scavenging from the environment for  
422 compounds which carried no evidence of active transport followed these same rules and was  
423 therefore prone to concentration gradients. Active transporters, on the other hand, allowed the cell  
424 to uptake whatever concentration of compound was necessary subject to its presence in the local  
425 ocean grid. Allowable exchange of metabolites between cells is illustrated in Figure 7. If several  
426 cells compete in that grid space, access to the available molecule was divided equally among those  
427 cells.



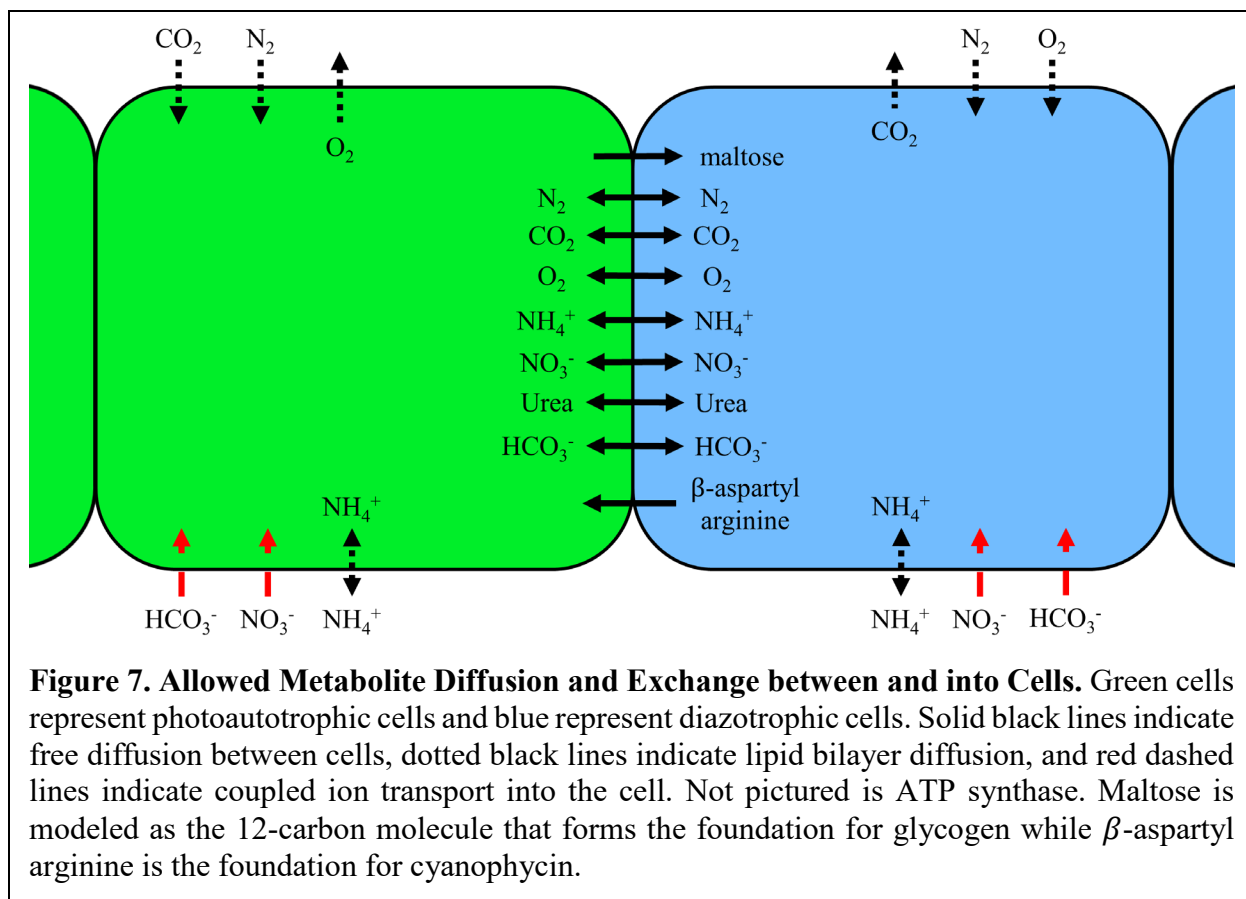

428

429 *Subclasses: Photoautotrophs and Diazotrophs*

430 Both subclasses define the uptake constraints and send to a Python file that decides whether the  
431 cell metabolizes or catabolizes based on those constraints using the multi-objective metabolic  
432 model previously described (see *Supplemental Information: Routine Metabolic Optimizations*).  
433 The cell then updates its internal metabolites based on the optimization results, diffuses  
434 metabolites, divides if possible, and uptakes from its local environment. Model bounds are  
435 calculated using local concentrations to calculate maximum flux bounds excepting  $\beta$ -aspartyl  
436 arginine which is further limited to 8% of available nutrients (See Figure S5). These methods are  
437 handled by three ScheduledMethods that Repast Symphony schedules in specific progression.  
438 Together with the Ocean Agent's updates, the individual cell actions (as dictated by the metabolic  
439 model) form the core of the simulation. A more detailed flow chart for cell decision making can

440 be found in Figure S6. Progression through these steps is identical for cell types, but the metabolic  
441 static variables (objectives, gas uptake, etc.) are different between the two subclasses, necessitating  
442 separate methods.

443

444 *Ocean*

445 The ocean agent is responsible for tracking cells and modeling external nutrients. Its main task is  
446 facilitating diffusion between cells and locations as well as approximating an uptake radius for  
447 cells. Each ocean represents a uniform, static, abstract area of the overall grid space with a uniform  
448 dimension space of  $\delta \times \delta$  where  $\delta$  is a user defined parameter. This set of simulations was  
449 conducted with time steps of 0.1 hours as a moderate value between diffusion phenomena (on the  
450 order of seconds along the length of a filament) and doubling time (on the order of 50 hours).  
451 Metabolites are assumed to freely diffuse in a dilute seawater environment between cell filaments  
452 (Table S6) and assumed to be uniform within the grid, given the relatively long time step compared  
453 to the rate of diffusion over such small dimensions. If the impacts of metabolic diffusion limitations  
454 were of interest, the time step within the framework could be made appropriately small to more  
455 accurately track metabolites, at cost of increased computational burden. Each ocean gridcell  
456 diffuses molecules into its adjacent ocean gridcells assuming discretized slab diffusion in two  
457 dimensions. This is done using a previously developed discrete algorithm for diffusion in a grid  
458 (66):

459

$$\Delta \bar{f}(x_i) = A \sum_{j=1}^n (f(x_i^j) - f(x_i)) e^{-d_j^2/\eta} \quad (16)$$

460

$$d_j = |x_i - x_i^j| \quad (17)$$

461

$$A \sum_{k=1}^n e^{-d_j^2/\eta} = 1 \quad (18)$$

462

463 Where  $\Delta \bar{f}(x_i)$  is the change in concentration of metabolite in grid space  $x_i$  over a time step,  $A$  is  
464 the normalization constant to be calculated by solving the third equation within the entire  
465 neighborhood to ensure conservation of mass within the neighborhood,  $d_j$  is the distance between  
466 grid space  $x_i$  and its grid neighbor  $x_i^j$  and  $\eta$  is the diffusivity control of the system over the time  
467 step. As  $\eta \rightarrow 0$  diffusion halts and as  $\eta \rightarrow \infty$  diffusion becomes instantaneous. In this study,  $\eta =$   
468  $4\mathcal{D}\Delta t$  as in the original Fick's Law.

469

470 Diffusion is calculated using two steps, one forward and one reversing the order of gridspace  
471 calculation, to mitigate the effect of order on estimating the concentration gradient (Figure S7).  
472 Excess ammonium is secreted into the environment using a membrane diffusion coefficient. Cells  
473 are allowed to uptake any metabolite/nutrient in YBC-II medium; the only extracellular products  
474 allowed in simulations are small molecules, such as  $\text{CO}_2$  and  $\text{NH}_4^+$  which diffuse through the  
475 membrane, as well as compounds that have experimental evidence of transporters from proteomic  
476 analysis or transcriptomic analysis (estimated using membrane diffusion outwardly and free  
477 diffusion for gases or active transporters for ions/molecules inwardly) in Table S7 (67, 68).

478

479 The Ocean Agents also manage diffusion of metabolites from marine sinks and through the gas-  
480 liquid surface interface with the atmosphere. This is done assuming equilibrium concentrations of

481 dissolved gases defined by Henry's Law and mono-directional slab diffusion for CO<sub>2</sub>, O<sub>2</sub>, and N<sub>2</sub>.  
482 Table S6 lists the free diffusivities of compounds and Table S8 lists the Henry's Constants for  
483 atmospheric compounds, and Figure S7 demonstrates the movement of diffusive molecules  
484 through the simulation.

485

486 Furthermore, light diffusion to cells is defined as a function of their y coordinate according to the  
487 equation:

$$I = I_0 e^{-ky} \quad (19)$$

488 Where  $I$  is light intensity,  $k$  is the extinction coefficient of light in seawater, and  $y$  is the depth  
489 below the surface of the individual cell.

490

#### 491 *Filaments*

492 Filament Agents are responsible for organizing cells, managing movement, splitting to promote  
493 diazotroph development, and defining cell type after division. Random walk movement (to  
494 simulate the lack of control cells have over lateral motion) is simulated by generating a random  
495 direction that has an empty grid space for every cell in the filament. Cells move within a user  
496 defined interval of time or if their growth is impeded by another filament, in which case growth is  
497 halted until the cells move away from each other. The filament forces splitting into two separate  
498 filaments when nitrogen is limiting growth and neither filament end is undergoing diazotroph  
499 development (meaning that another diazocyte is required). Filament Agents decide the next cell  
500 type using this inequality:

501

$$\frac{\sum_i \varepsilon_i^{DZ}}{n_{DZ}} > \frac{\sum_i \varepsilon_i^{PA}}{n_{PA}} \quad (20)$$

502

503 Where  $\varepsilon$  is the Pareto Efficiency of the given cell type and  $n$  is the quantity of that cell type in the  
504 filament. The Pareto Efficiency is quantified as the sum of the objective fluxes divided by their  
505 Pareto Optimum (from experimental results) divided by the number of objectives.

$$\varepsilon_i^c = \sum_j \frac{v_j}{v_j^{exp}} \quad (21)$$

506 If inequality (20) is satisfied, the cell prioritizes diazotroph development, otherwise it prioritizes  
507 photoautotroph development. If a diazotroph region is currently under development, the filament  
508 adds another cell to that region. If there is no diazotroph under development, or if the C:N ratio  
509 becomes higher than physiological bounds, the filament splits to expose a region where diazotroph  
510 development may begin. A photoautotroph can be placed at any open site. Since there are two ends  
511 on every filament, up to two of these decisions are being made during each simulation time step.  
512 After filament splitting, if the split results in a homogenous region of either diazotrophs or  
513 photoautotrophs, the missing cell type is preferred. Filaments split in the middle of the longest  
514 region of homogenous cells and are prevented from splitting to result in a single cell, meaning that  
515 the shortest possible resulting splits are two cells in length. Cell division completes within one  
516 time step when metabolites and biomass are equally divided between parent and daughter cell and  
517 the filament updates to contain the cell at its end. This decision is a memoryless process conducted  
518 each time step. This means that cell division is completely metabolically motivated (which is  
519 affected, in turn, by diffusion and physiological processes).

520

521 **Parameter Estimation.** As described previously, to improve the accuracy of simulations, the  
 522 model was fit to experimental data for cells grown in 100  $\mu\text{E}$  light in YBC-II medium. Maintenance  
 523 energy, in the form of the ATP hydrolysis reaction, is the main parameter that is adjusted in FBA  
 524 formulations (3, 69-72) to match simulations with growth rate. Since maintenance energy at 100  
 525  $\mu\text{E}$  was higher than the energetic capacity of the model for growth at 50  $\mu\text{E}$ , a linear correlation  
 526 was interpolated from experiments at 100  $\mu\text{E}$  and 80  $\mu\text{E}$  with ATP maintenance flux fit to both  
 527 cases for each cell type:

$$v_{ATP}(I) = mI + v_0 \quad (22)$$

528 Where  $m$  and  $v_0$  are calculated using the point-slope equation for a linear equation:

$$m = \frac{v_{ATP,I_1} - v_{ATP,I_2}}{I_1 - I_2} \quad (23)$$

$$v_0 = -I_1 m + v_{ATP,I_1} \quad (24)$$

529 Where  $I_1$  is 100  $\mu\text{E}$  and  $I_2$  is 80  $\mu\text{E}$ . The estimated values of the linear equation are recorded below  
 530 in Table 1. If the model is unable to satisfy its maintenance demand (through any metabolic  
 531 process, including catabolizing its own biomass), the cell dies.  $L_0$  is the energy required in zero  
 532 light to maintain the cell without active metabolism.

533

**Table 1: ATP maintenance flux requirements estimated as a function of light intensity for Pareto Fitting.**

| Cell Type      | Maintenance Energy, $v_{ATP}$                                        |                                                                       | $m$<br>$\left(\frac{\text{mmol}}{\text{g DW h } \mu\text{E}}\right)$ | $v_0$<br>$\left(\frac{\text{mmol}}{\text{g DW h}}\right)$ | $L_0$ ( $\mu\text{E}$ ) |
|----------------|----------------------------------------------------------------------|-----------------------------------------------------------------------|----------------------------------------------------------------------|-----------------------------------------------------------|-------------------------|
|                | 80 $\mu\text{E}$<br>$\left(\frac{\text{mmol}}{\text{g DW h}}\right)$ | 100 $\mu\text{E}$<br>$\left(\frac{\text{mmol}}{\text{g DW h}}\right)$ |                                                                      |                                                           |                         |
| Photoautotroph | 34.3                                                                 | 53.3                                                                  | 0.952                                                                | -16.7                                                     | 16.9                    |
| Diazotroph     | 62.3                                                                 | 82.0                                                                  | 0.987                                                                | -41.9                                                     | 44.0                    |

534

535 **Multi-Objective Optimization.** Unlike typical formulations of flux balance analysis (14, 71-76),  
536 which use a single objective function to predict fluxes, our model uses multi-objective  
537 optimization to more accurately approximate the true objectives of the cell: to optimize biomass  
538 while also producing the metabolite they exchange between cell types. Implementation of multi-  
539 objective optimization is more complex and computationally intense than single objective  
540 optimization therefore, to minimize computational effort, Pareto Fronts were generated *a priori* by  
541 iteratively increasing ATP maintenance flux and using every permutation of objective weights to  
542 fit to a dominant front (see *SI Methods* and Figure S8 for more complete details). For each point  
543 along the Pareto Front, Euclidean distance was used to determine the relative weight of each  
544 objective function, which was then used to generate a single, scalarized reaction. Each cell in the  
545 simulation calculates its scalar objective function separately during each time step based on its  
546 internal constitution and requirements.

547

548 **Implementation of Mutable Objective Functions.** Previous studies have used static objective  
549 functions, where production is consistent during every phase of growth. However, organisms  
550 accumulate and digest metabolites during growth and development. To reflect this, we inserted a  
551 “mutable” objective function where relative preferences of storage compounds and biomass  
552 production can be tailored by the agent based on cell biomass. The scalarized objective equation  
553 was thus broken into two main components: storage compounds (cyanophycin modeled as  $\beta$ -  
554 aspartyl arginine and glycogen modeled as maltose) and biomass (lipids, proteins, DNA, RNA,  
555 chlorophyll, phycoerythrin, etc.). We assumed that biomass remained relatively stable throughout  
556 the day while the amount of storage compound was allowed to vary. The scalar weights, or

557 production priorities, were manipulated assuming cells do not grow beyond twice their average  
558 cell without dividing: lower biomass prioritizes growth and higher biomass prioritizes vegetative  
559 storage compound production. Mathematically, this is modeled such that the scalar objective  
560 equation's biomass coefficient was inversely adjusted by cumulative probability of a cell's  
561 biomass in the distribution. The normal distribution was formulated assuming cubic 10  $\mu\text{m}$  cells  
562 with density of water (77) as the average mass and a narrow distribution with a standard deviation  
563 of 0.433 times the mean size. This value was chosen to promote switch-like bistable behavior  
564 between cell phenotypes: either cells are biomass driven (exponential) or they are metabolite  
565 driven with combinations of probabilities in between. This is because a single sample of a cell  
566 from a distribution of cells would have a probability of 99% to fall between 0 and twice the mean  
567 size. The final distribution is:

$$f(X) \sim N(1.029 \text{ ng}, 0.433 \cdot 1.029 \text{ ng}) \quad (25)$$

568 Calculation of new objective coefficients was done by first finding the cumulative probability ( $z$ )  
569 of another randomly selected cell's non-metabolite biomass being less than or equal to the  
570 objective cell's biomass at each time point for each cell:

$$z = F(X \leq x_i) \quad (26)$$

571 This is used to adjust the average, experimentally matched objective coefficient ( $\bar{w}_b$ ) for biomass  
572 by multiplying that coefficient by the probability of the cell being larger than that size, a value that  
573 represents the probabilistic expansion space ( $\epsilon$ ) of the cell:

$$\epsilon = 1 - z \quad (27)$$

$$\hat{w}_b = \epsilon \cdot \bar{w}_b \quad (28)$$



574 Major metabolite coefficients for the scalarized objective equation were also adjusted using this  
575 probability, increasing as the cell's size increased:

$$\hat{w}_m = z \cdot \bar{w}_m \quad (29)$$

576 Finally, the coefficients are normalized such that:

$$a \sum_i \hat{w}_i = 1 \quad (30)$$

577 Or:

$$a = \frac{1}{\sum_i \hat{w}_i} \quad (31)$$

578 Which yields final objective coefficients of:

$$w_k = \frac{\hat{w}_k}{\sum_i \hat{w}_i} \quad \forall k \in \mathcal{O} \quad (32)$$

579 Where  $\mathcal{O}$  is the set of all objective metabolites in the original scalar equation.

580 Performance evaluation of the mutable objective function, validation of the mutable objective  
581 function versus the static version, and justification of non-metabolite biomass as the independent  
582 objective are provided in *SI Methods* and Figure S9.

583

584 **ABBREVIATIONS.** 6PG: 6-phospho-D-gluconate, 6PGDL: 6-phosph-D-glucono-1,5-lactone,  
585 ABM: Agent-Based Modeling, AcCoA: Acetyl-CoA, AKG/ $\alpha$ KG:  $\alpha$ -ketoglutarate/2-oxoglutarate,  
586 ALA: L-alanine,  $\beta$ ASP-ARG,  $\beta$ -aspartyl arginine,  $\beta$ G6P:  $\beta$ -glucose-6-phosphate, CBB: Calvin-  
587 Benson-Bassham Cycle, CDeg: Cyanophycin Degradation to Amino Acids, cEFMA: community  
588 Elementary Flux Mode Analysis, CIT: Citrate, COBRA: Constraint-Based Reconstruction and  
589 Analysis Toolbox, CobraPy: Constraint-Based Reconstruction and Analysis Toolbox for Python,  
590 COMETS: Computation of Microbial Ecosystems in Time and Space, CSV, Comma Separated

591 Value, cph: Cyanophycin, CSyn: Cyanophycin Synthesis from Amino Acids, dFBA: dynamic Flux  
592 Balance Analysis, DHAP: Dihydroxyacetone phosphate, DON: Dissolved Organic Nitrogen,  
593 E4P: Erythrose-4-phosphate, EF: Efflux, EX: Export, F6P: Fructose-6-phosphate, FBA: Flux  
594 Balance Analysis, FDP: Fructose 1,6-diphosphate, FOR: Formate, FUM: Fumarate, FVA: Flux  
595 Variability Analysis, G6P: Glucose-6-phosphate, GAP: Glyceraldehyde 3-phosphate, GDeg:  
596 Glycogen degradation, GLX: Glyoxylate (flux maps) or Glyoxylate and dicarboxylate metabolism  
597 (Figure 4), GLY: Glycine (flux maps) or Glycogen/Gluconeogenesis (Figure 4), gly: Glycogen,  
598 GLYR: Glycerate, GOL: Glycerol, GP: 3-phosphoglycerate, GSyn: Glycogen synthesis,  
599 ICIT: Isocitrate, IN: Influx, JSON: JavaScript Object Notation, jyCOBRA: java-python integrated  
600 COBRA, KEGG: Kyoto Encyclopedia of Genes and Genomes, LIP: Lipid metabolism,  
601 MAL: Malate, MSM: Multiscale Modeling, OAA: Oxaloacetate, PEP: Phosphoenolpyruvate,  
602 PGOL: Phosphoglycolate, Pi: Inorganic phosphate, PPP: Oxidative Pentose Phosphate Pathway,  
603 PRO: Protein synthesis, PYR: Pyruvate, R5P: Ribose-5-phosphate, REF: Reflux, Ru5P: Ribulose-  
604 5-phosphate, RuBP: Ribulose 1,5-bisphosphate, S17P: Sedoheptulose 1,7-bisphosphate,  
605 S7P: Sedoheptulose 7-phosphate, SBML: Systems Biology Markup Language, SUCC: Succinate,

606 SUCSAL: Succinic semialdehyde, SDA: Subsystem Distribution Analysis, TCA: Tricarboxylic  
607 acid cycle, TCP/IP: Transmission Control Protocol/Internet Protocol, X5P: Xylulose 5-phosphate

## 608 **DECLARATIONS**

### 609 *Competing Interests*

610 The authors declare that they have no competing interests.

### 611 *Funding*

612 This work was supported by a grant from the Department of Energy Office of Science, Biological  
613 and Environmental Research (BER) Early Career Program grant no. DE-SC0019171.

### 614 *Availability of data and materials*

615 The ABM framework and datasets resulting/analyzed from simulations are available on the  
616 GitHub repository at <https://github.com/boylelab/iTery101-ABM> with username “boylelab” and  
617 password “diaz01”. We will make this public upon publication.

### 618 *Author contributions*

619 JJG, BMSH and NRB designed the research. JJG performed the research. JJG and NRB analyzed  
620 the data. JJG, BMSH and NRB wrote the manuscript.

### 621 *Acknowledgements*

622 Not applicable.

623

## 624 **REFERENCES**

- 625 1. Boatman TG, Lawson T, Geider RJ. A key marine diazotroph in a changing ocean: The  
626 interacting effects of temperature, CO<sub>2</sub> and light on the growth of *Trichodesmium erythraeum*  
627 IMS101. *PloS one*. 2017;12(1):e0168796.
- 628 2. Breitbarth E, Wohlers J, Kläs J, LaRoche J, Peeken I. Nitrogen fixation and growth rates  
629 of *Trichodesmium* IMS-101 as a function of light intensity. *Marine Ecology Progress Series*.  
630 2008;359:25-36.
- 631 3. Gardner JJ, Boyle NR. The use of genome-scale metabolic network reconstruction to  
632 predict fluxes and equilibrium composition of N-fixing versus C-fixing cells in a diazotrophic  
633 cyanobacterium, *Trichodesmium erythraeum*. *BMC systems biology*. 2017;11(1):4.
- 634 4. Blazeck J, Alper H. Systems metabolic engineering: Genome-scale models and beyond.  
635 *Biotechnology Journal*. 2010;5(7):647-59.
- 636 5. Tenazinha N, Vinga S. A Survey on Methods for Modeling and Analyzing Integrated  
637 Biological Networks. *Computational Biology and Bioinformatics, IEEE/ACM Transactions on*.  
638 2011;8(4):943-58.
- 639 6. Kranz SA, Dieter S, Richter K-U, Rost B. Carbon acquisition by *Trichodesmium*: the effect  
640 of pCO<sub>2</sub> and diurnal changes. *Limnology and Oceanography*. 2009;54(2):548-59.
- 641 7. Flynn KJ. Ecological modelling in a sea of variable stoichiometry: dysfunctionality and the  
642 legacy of Redfield and Monod. *Progress in Oceanography*. 2010;84(1-2):52-65.
- 643 8. Mahadevan R, Schilling C. The effects of alternate optimal solutions in constraint-based  
644 genome-scale metabolic models. *Metabolic engineering*. 2003;5(4):264-76.
- 645 9. Hutchins D, Fu F-X, Zhang Y, Warner M, Feng Y, Portune K, et al. CO<sub>2</sub> control of  
646 *Trichodesmium* N<sub>2</sub> fixation, photosynthesis, growth rates, and elemental ratios: Implications for  
647 past, present, and future ocean biogeochemistry. *Limnology and Oceanography*. 2007;52(4):1293-  
648 304.
- 649 10. Spungin D, Berman-Frank I, Levitan O. *Trichodesmium*'s strategies to alleviate  
650 phosphorus limitation in the future acidified oceans. *Environmental microbiology*.  
651 2014;16(6):1935-47.
- 652 11. Covert MW, Schilling CH, Famili I, Edwards JS, Goryanin II, Selkov E, et al. Metabolic  
653 modeling of microbial strains in silico. *Trends Biochem Sci*. 2001;26.
- 654 12. Karr JR, Sanghvi JC, Macklin DN, Gutschow MV, Jacobs JM, Bolival Jr B, et al. A whole-  
655 cell computational model predicts phenotype from genotype. *Cell*. 2012;150(2):389-401.
- 656 13. Harcombe WR, Riehl WJ, Dukovski I, Granger BR, Betts A, Lang AH, et al. Metabolic  
657 resource allocation in individual microbes determines ecosystem interactions and spatial  
658 dynamics. *Cell reports*. 2014;7(4):1104-15.
- 659 14. Mahadevan R, Edwards JS, Doyle FJ. Dynamic flux balance analysis of diauxic growth in  
660 *Escherichia coli*. *Biophysical journal*. 2002;83(3):1331-40.
- 661 15. Zhuang K, Ma E, Lovley DR, Mahadevan R. The design of long-term effective uranium  
662 bioremediation strategy using a community metabolic model. *Biotechnology and bioengineering*.  
663 2012;109(10):2475-83.
- 664 16. Zomorodi AR, Maranas CD. OptCom: a multi-level optimization framework for the  
665 metabolic modeling and analysis of microbial communities. *PLoS Comput Biol*.  
666 2012;8(2):e1002363.
- 667 17. Zomorodi AR, Islam MM, Maranas CD. d-OptCom: dynamic multi-level and multi-  
668 objective metabolic modeling of microbial communities. *ACS synthetic biology*. 2014;3(4):247-  
669 57.

- 670 18. Oberhardt MA, Zarecki R, Gronow S, Lang E, Klenk H-P, Gophna U, et al. Harnessing the  
671 landscape of microbial culture media to predict new organism–media pairings. *Nature*  
672 *communications*. 2015;6:8493.
- 673 19. Oberhardt M, Palsson B, Papin J. Applications of genome-scale metabolic reconstructions.  
674 *Mol Syst Biol*. 2009;5:320.
- 675 20. Fiegna F, Moreno-Letelier A, Bell T, Barraclough TG. Evolution of species interactions  
676 determines microbial community productivity in new environments. *The ISME journal*.  
677 2015;9(5):1235.
- 678 21. Borshchev A, Filippov A, editors. From system dynamics and discrete event to practical  
679 agent based modeling: reasons, techniques, tools. Proceedings of the 22nd international conference  
680 of the system dynamics society; 2004: Citeseer.
- 681 22. Klann M, Lapin A, Reuss M. Agent-based simulation of reactions in the crowded and  
682 structured intracellular environment: Influence of mobility and location of the reactants. *BMC*  
683 *Systems Biology*. 2011;5(1):71.
- 684 23. Segovia-Juarez JL, Ganguli S, Kirschner D. Identifying control mechanisms of granuloma  
685 formation during *M. tuberculosis* infection using an agent-based model. *Journal of Theoretical*  
686 *Biology*. 2004;231(3):357-76.
- 687 24. Parunak HVD. Practical and industrial applications of agent-based systems. Environmental  
688 Research Institute of Michigan (ERIM). 1998.
- 689 25. Bin C, Gang G, Xiaogang Q, editors. The Application of Multi-paradigm Modeling in  
690 Social Computation. Digital Manufacturing and Automation (ICDMA), 2013 Fourth International  
691 Conference on; 2013 29-30 June 2013.
- 692 26. Hardebolle C, Boulanger F. Exploring Multi-Paradigm Modeling Techniques.  
693 *SIMULATION*. 2009;85(11-12):688-708.
- 694 27. Hodge B-M, Shukla A, Huang S, Reklaitis G, Venkatasubramanian V, Pekny J. Multi-  
695 Paradigm Modeling of the Effects of PHEV Adoption on Electric Utility Usage Levels and  
696 Emissions. *Industrial & Engineering Chemistry Research*. 2011;50(9):5191-203.
- 697 28. Hodge B-MS, Huang S, Sirola JD, Pekny JF, Reklaitis GV. A multi-paradigm modeling  
698 framework for energy systems simulation and analysis. *Computers & Chemical Engineering*.  
699 2011;35(9):1725-37.
- 700 29. Mosterman PJ, Vangheluwe H. Computer Automated Multi-Paradigm Modeling: An  
701 Introduction. *SIMULATION*. 2004;80(9):433-50.
- 702 30. Machado D, Costa R, Rocha M, Ferreira E, Tidor B, Rocha I. Modeling Formalisms in  
703 *Systems Biology*. *AMB Express*. 2011;1(1):45.
- 704 31. Simons M, Misra A, Sriram G. Genome-Scale Models of Plant Metabolism. In: Sriram G,  
705 editor. *Plant Metabolism. Methods in Molecular Biology*. 1083: Humana Press; 2014. p. 213-30.
- 706 32. Heinken A, Sahoo S, Fleming RM, Thiele I. Systems-level characterization of a host-  
707 microbe metabolic symbiosis in the mammalian gut. *Gut microbes*. 2013;4(1):28-40.
- 708 33. Libourel IGL, Shachar-Hill Y. Metabolic Flux Analysis in Plants: From Intelligent Design  
709 to Rational Engineering. *Annual Review of Plant Biology*. 2008;59(1):625-50.
- 710 34. Mahadevan R, Edwards JS, Doyle Iii FJ. Dynamic Flux Balance Analysis of Diauxic  
711 Growth in *Escherichia coli*. *Biophysical Journal*. 2002;83(3):1331-40.
- 712 35. Zhuang K, Ma E, Lovley DR, Mahadevan R. The design of long-term effective uranium  
713 bioremediation strategy using a community metabolic model. *Biotechnol Bioeng*. 2012;109.
- 714 36. Berman-Frank I, Lundgren P, Falkowski P. Nitrogen fixation and photosynthetic oxygen  
715 evolution in cyanobacteria. *Research in Microbiology*. 2003;154:157-64.

- 716 37. Glibert PM, Bronk DA. Release of Dissolved Organic Nitrogen by Marine Diazotrophic  
717 Cyanobacteria, *Trichodesmium* spp. Applied and Environmental Microbiology.  
718 1994;60(11):3996-4000.
- 719 38. Burnat M, Herrero A, Flores E. Compartmentalized cyanophycin metabolism in the  
720 diazotrophic filaments of a heterocyst-forming cyanobacterium. Proceedings of the National  
721 Academy of Sciences. 2014;111(10):3823-8.
- 722 39. Sherman DM, Tucker D, Sherman LA. Heterocyst development and localization of  
723 cyanophycin in N<sub>2</sub>-fixing cultures of *Anabaena* sp. PCC 7120 (cyanobacteria). Journal of  
724 Phycology. 2000;36(5):932-41.
- 725 40. Simon RD. Cyanophycin granules from the blue-green alga *Anabaena cylindrica*: a reserve  
726 material consisting of copolymers of aspartic acid and arginine. Proceedings of the national  
727 academy of sciences. 1971;68(2):265-7.
- 728 41. Levitan O, Brown CM, Sudhaus S, Campbell D, LaRoche J, Berman-Frank I. Regulation  
729 of nitrogen metabolism in the marine diazotroph *Trichodesmium* IMS101 under varying  
730 temperatures and atmospheric CO<sub>2</sub> concentrations. Environmental microbiology.  
731 2010;12(7):1899-912.
- 732 42. Eichner M, Thoms S, Kranz SA, Rost B. Cellular inorganic carbon fluxes in  
733 *Trichodesmium*: a combined approach using measurements and modelling. Journal of  
734 experimental botany. 2014;66(3):749-59.
- 735 43. Buitenhuis E, Vogt M, Moriarty R, Bednarsek N, Doney S, Leblanc K, et al. MAREDAT:  
736 towards a world atlas of MARine Ecosystem DATa. Earth System Science Data. 2013;5:227-39.
- 737 44. Berman-Frank I, Lundgren P, Chen Y-B, Küpper H, Kolber Z, Bergman B, et al.  
738 Segregation of Nitrogen Fixation and Oxygenic Photosynthesis in the Marine Cyanobacterium  
739 *Trichodesmium*. Science. 2001;294(5546):1534-7.
- 740 45. Zhang S, Bryant DA. The Tricarboxylic Acid Cycle in Cyanobacteria. Science.  
741 2011;334(6062):1551-3.
- 742 46. Luo Y, Doney S, Anderson L, Benavides M, Berman-Frank I, Bode A, et al. Database of  
743 Diazotrophs in Global Ocean: Abundance, Biomass, and Nitrogen Fixation Rates. Earth System  
744 Science Data. 2012;4(1).
- 745 47. White AE, Watkins-Brandt KS, Church MJ. Temporal Variability of *Trichodesmium* spp.  
746 and Diatom-Diazotroph Assemblages in the North Pacific Subtropical Gyre. Frontiers in Marine  
747 Science. 2018;5:27.
- 748 48. Yoo S-H, Keppel C, Spalding M, Jane J-l. Effects of growth condition on the structure of  
749 glycogen produced in cyanobacterium *Synechocystis* sp. PCC6803. International journal of  
750 biological macromolecules. 2007;40(5):498-504.
- 751 49. Cai X, Gao K, Fu F, Campbell DA, Beardall J, Hutchins DA. Electron transport kinetics in  
752 the diazotrophic cyanobacterium *Trichodesmium* spp. grown across a range of light levels.  
753 Photosynthesis research. 2015;124(1):45-56.
- 754 50. Schuetz R, Kuepfer L, Sauer U. Systematic evaluation of objective functions for predicting  
755 intracellular fluxes in *Escherichia coli*. Mol Syst Biol. 2007;3:119.
- 756 51. Blaby IK, Glaesener AG, Mettler T, Fitz-Gibbon ST, Gallaher SD, Liu B, et al. Systems-  
757 Level Analysis of Nitrogen Starvation-Induced Modifications of Carbon Metabolism in a  
758 *Chlamydomonas reinhardtii* Starchless Mutant. The Plant Cell Online. 2013;25(11):4305-23.
- 759 52. Boyle NR, Page MD, Liu B, Blaby IK, Casero D, Kropat J, et al. Three Acyltransferases  
760 and Nitrogen-responsive Regulator Are Implicated in Nitrogen Starvation-induced Triacylglycerol  
761 Accumulation in *Chlamydomonas*. Journal of Biological Chemistry. 2012;287(19):15811-25.

- 762 53. Breuer G, Lamers PP, Martens DE, Draaisma RB, Wijffels RH. The impact of nitrogen  
763 starvation on the dynamics of triacylglycerol accumulation in nine microalgae strains. *Bioresource*  
764 *Technology*. 2012;124:217-26.
- 765 54. Hockin NL, Mock T, Mulholland F, Kopriva S, Malin G. The Response of Diatom Central  
766 Carbon Metabolism to Nitrogen Starvation Is Different from That of Green Algae and Higher  
767 Plants. *Plant Physiology*. 2012;158(1):299-312.
- 768 55. Tedesco MA, Duerr EO. Light, temperature and nitrogen starvation effects on the total  
769 lipid and fatty acid content and composition of *Spirulina platensis* UTEX 1928. *Journal of Applied*  
770 *Phycology*. 1989;1(3):201-9.
- 771 56. Kropat J, Hong-Hermesdorf A, Casero D, Ent P, Castruita M, Pellegrini M, et al. A revised  
772 mineral nutrient supplement increases biomass and growth rate in *Chlamydomonas reinhardtii*.  
773 *The Plant journal : for cell and molecular biology*. 2011;66(5):770-80.
- 774 57. Boatman TG, Davey PA, Lawson T, Geider RJ. The physiological cost of diazotrophy for  
775 *Trichodesmium erythraeum* IMS101. *PloS one*. 2018;13(4):e0195638.
- 776 58. Boatman TG, Davey PA, Lawson T, Geider RJ. CO<sub>2</sub> modulation of the rates of  
777 photosynthesis and light-dependent O<sub>2</sub> consumption in *Trichodesmium*. *Journal of experimental*  
778 *botany*. 2018;70(2):589-97.
- 779 59. Boatman TG, Mangan NM, Lawson T, Geider RJ. Inorganic carbon and pH dependency  
780 of photosynthetic rates in *Trichodesmium*. *Journal of experimental botany*. 2018:ery141.
- 781 60. Chen Y-B, Zehr JP, Mellon M. Growth and Nitrogen Fixation of the Diazotrophic  
782 Filamentous Nonheterocytous Cyanobacterium *Trichodesmium* sp. IMS 101 in Defined Media:  
783 Evidence for a Circadian Rhythm. *Journal of Phycology*. 1996;32(6):916-23.
- 784 61. Harris EH, Stern DB, Witman G. *The Chlamydomonas sourcebook*: Cambridge Univ  
785 Press; 2009.
- 786 62. Yemm E, Willis A. The estimation of carbohydrates in plant extracts by anthrone.  
787 *Biochemical journal*. 1954;57(3):508.
- 788 63. Messineo L. Modification of the Sakaguchi reaction: spectrophotometric determination of  
789 arginine in proteins without previous hydrolysis. *Archives of Biochemistry and Biophysics*.  
790 1966;117(3):534-40.
- 791 64. Liddicoat M, Tibhitts S, Butler E. The determination of ammonia in seawater. *Limnology*  
792 *and Oceanography*. 1975;20(1):131-2.
- 793 65. Collier N, North M. Parallel agent-based simulation with repast for high performance  
794 computing. *Simulation*. 2013;89(10):1215-35.
- 795 66. Grajdeanu A. Modeling Diffusion in a Discrete Environment. George Mason University  
796 Technical Report Series. 2007:1-5.
- 797 67. Sandh G, Ran L, Xu L, Sundqvist G, Bulone V, Bergman B. Comparative proteomic  
798 profiles of the marine cyanobacterium *Trichodesmium erythraeum* IMS101 under different  
799 nitrogen regimes. *Proteomics*. 2011;11(3):406-19.
- 800 68. Pfreundt U, Kopf M, Belkin N, Berman-Frank I, Hess WR. The primary transcriptome of  
801 the marine diazotroph *Trichodesmium erythraeum* IMS101. *Scientific reports*. 2014;4.
- 802 69. Boyle NR, Shastri AA, Morgan JA. Network Stoichiometry In: Schwender J, editor. *Plant*  
803 *Metabolic Networks*. New York: Springer New York 2009. p. 211-43.
- 804 70. Boyle N, Morgan J. Flux balance analysis of primary metabolism in *Chlamydomonas*  
805 *reinhardtii*. *BMC Systems Biology*. 2009;3(1):4.

- 806 71. Knoop H, Gründel M, Zilliges Y, Lehmann R, Hoffmann S, Lockau W, et al. Flux Balance  
807 Analysis of Cyanobacterial Metabolism: The Metabolic Network of *Synechocystis* sp. PCC 6803.  
808 PLoS Comput Biol. 2013;9(6):e1003081.
- 809 72. Misra A, Conway MF, Johnnie J, Qureshi TM, Derrick AM, Agbo EC, et al. Metabolic  
810 analyses elucidate nontrivial gene targets for amplifying dihydroartemisinic acid production in  
811 yeast. *Frontiers in Microbiology*. 2013;4.
- 812 73. Orth JD, Thiele I, Palsson BO. What is flux balance analysis? *Nat Biotech*. 2010;28(3):245-  
813 8.
- 814 74. Kauffman KJ, Prakash P, Edwards JS. Advances in flux balance analysis. *Current Opinion*  
815 *in Biotechnology*. 2003;14(5):491-6.
- 816 75. Edwards J, Ramakrishna R, Schilling C, Palsson B. Metabolic flux balance analysis.  
817 *Metabolic engineering*. 1999.
- 818 76. Asadollahi MA, Maury J, Patil KR, Schalk M, Clark A, Nielsen J. Enhancing sesquiterpene  
819 production in *Saccharomyces cerevisiae* through in silico driven metabolic engineering. *Metabolic*  
820 *Engineering*. 2009;11(6):328-34.
- 821 77. van Baalen C, Brown Jr RM. The ultrastructure of the marine blue green alga,  
822 *Trichodesmium erythraeum*, with special reference to the cell wall, gas vacuoles, and cylindrical  
823 bodies. *Archiv für Mikrobiologie*. 1969;69(1):79-91.

824
